# Supplementary material for: Characterization of the relationship between polar and lateral flagellar structural genes in the deep-sea bacterium Shewanella piezotolerans WP3
Source: PubMed Central journal article supplement (PMC5178100; doi:10.1038/srep39758), 2016-12-22
Supplement: srep39758-s1.pdf [file srep39758-s1.pdf]

## Supplementary Information

### Characterization of the relationship between polar and lateral flagellar structural genes in the deep-sea bacterium

#### *Shewanella piezotolerans* WP3

Huahua Jian<sup>1</sup>, Han Wang<sup>1</sup>, Xianping Zeng<sup>1</sup>, Lei Xiong<sup>1</sup>, Fengping Wang<sup>1</sup>,  
Xiang Xiao<sup>1,2\*</sup>

1, State Key Laboratory of Microbial Metabolism, School of Life Sciences and  
Biotechnology, Shanghai Jiao Tong University, Shanghai, PR China

2, State Key Laboratory of Ocean Engineering, School of Naval Architecture,  
Ocean and Civil Engineering, Shanghai Jiao Tong University, Shanghai, PR  
China

\* Correspondence to Xiang Xiao, [xoxiang@sjtu.edu.cn](mailto:xoxiang@sjtu.edu.cn)

## Figures

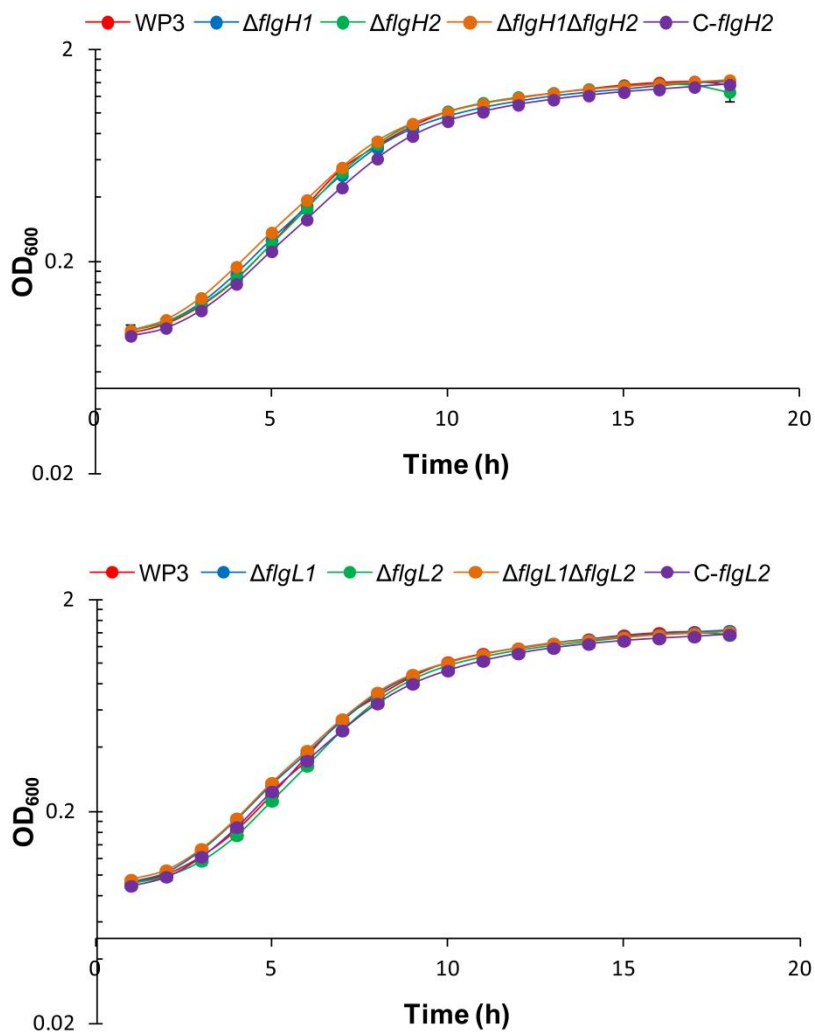

**Figure S1.** Growth assay of WP3 flagellar gene deletion mutants. The growth of WP3 and the mutants was monitored by measuring the optical density of the cultures at OD<sub>600</sub>. The mean values with standard deviations (indicated by vertical bars) from triplicate experiments are given.

**A**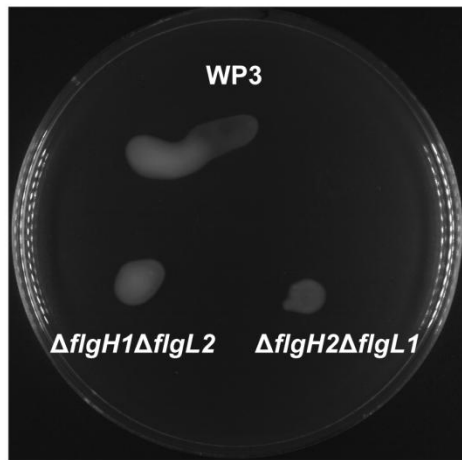**B**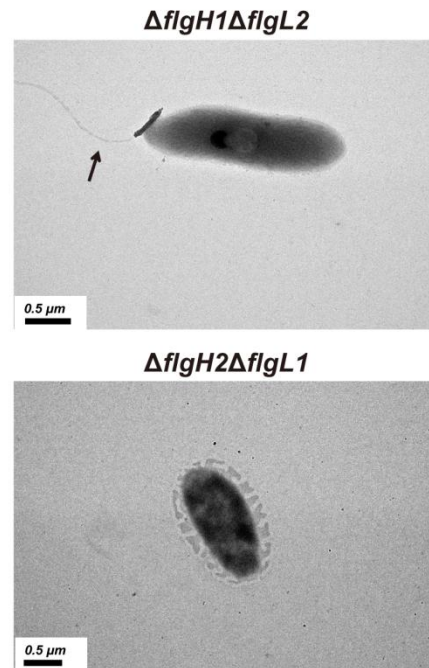

**Figure S2.** Effect of non-allelic flagellar genes mutation on the swarming motility and flagellar production on agar plates. (A) Swarming motility assays of the flagellar gene deletion mutants. The results represent two independent experiments. (B) TEM analysis of WP3 flagellar gene mutants that were cultured on swarming agar plate. Black arrow indicates the polar flagellum. The scale bars are indicated in the lower-left corner.

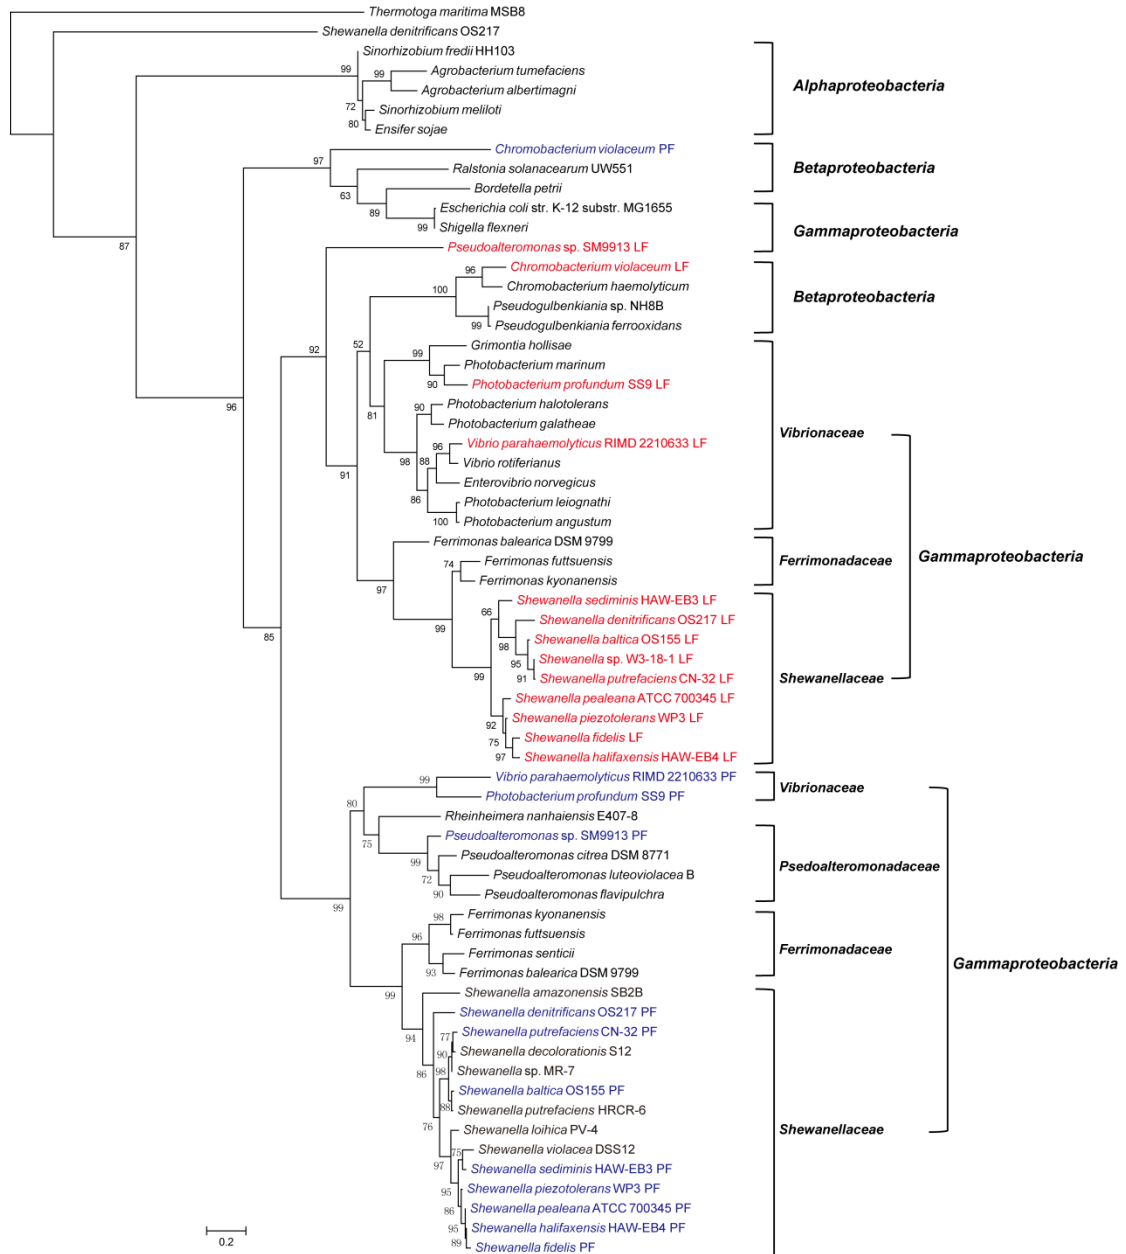

**Figure S3.** Phylogenetic tree of FlgH protein sequences of proteobacteria. “PF” and “LF” after species names indicate polar and lateral flagellar systems, which are shown in blue and red, respectively. FlgH of *Thermotoga maritima* was used as the out-group. The scale bar represents amino acid substitutions per site, and numbers represent the branch support values in percentage. For each data set, bootstrap values were obtained with 1,000 replicates.

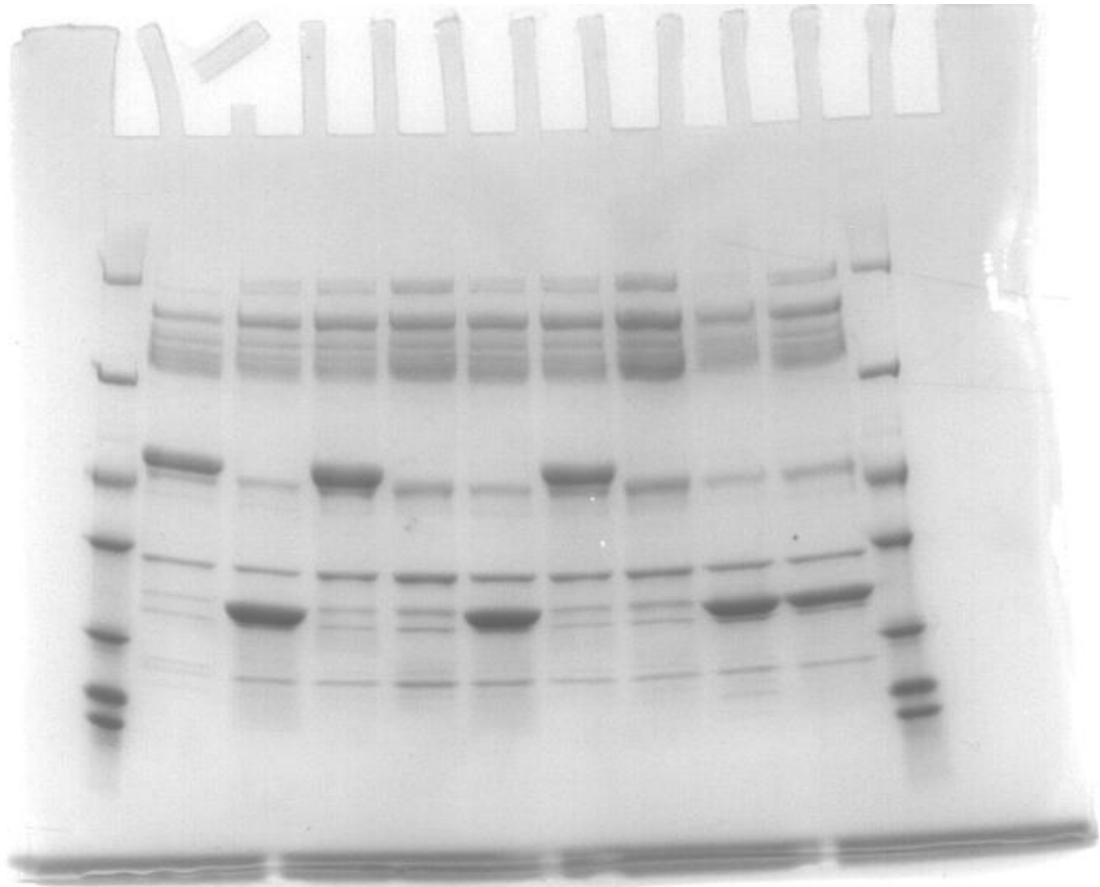

**Figure S4.** SDS-PAGE analysis of isolated flagellins from WP3 flagellar gene mutants and complemented strains.

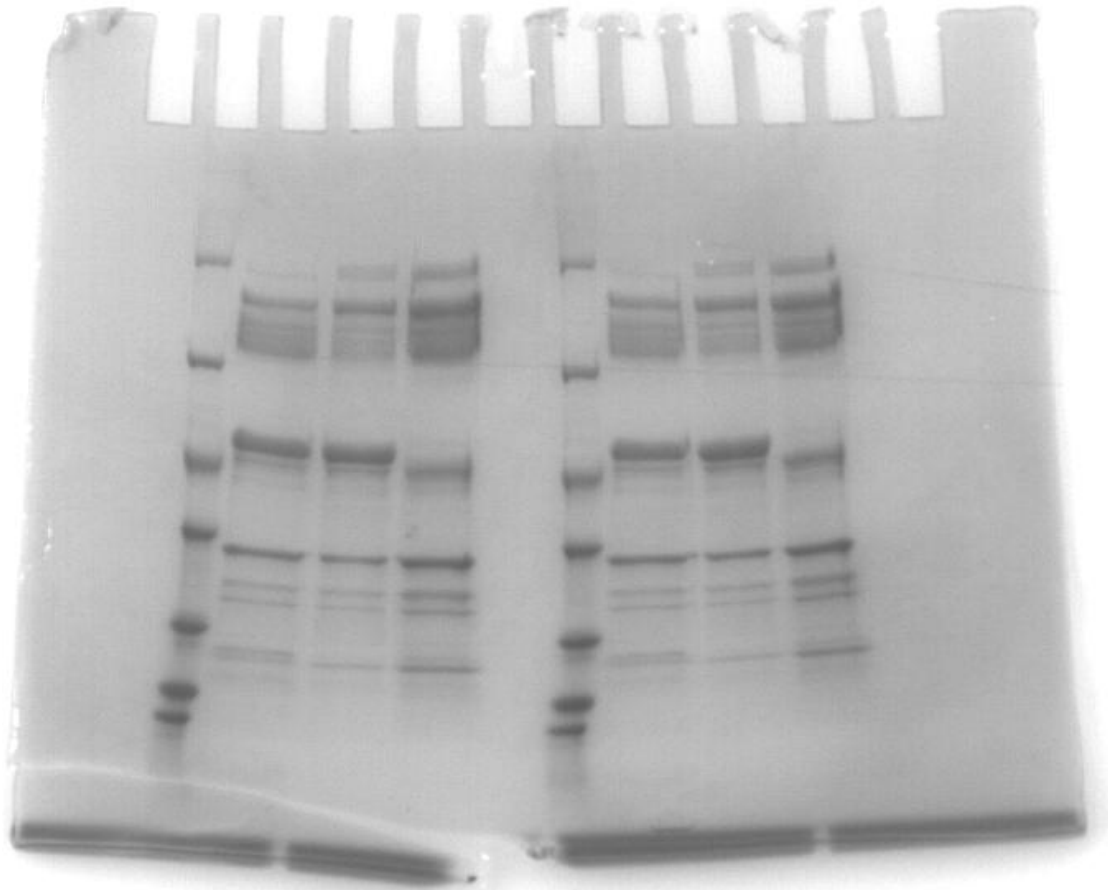

**Figure S5.** SDS-PAGE analysis of isolated flagellins from WP3 flagellar gene mutants.

## Tables

**Table S1. Primers and probe used in this study**

| Primer name  | Sequence (5'-3')                     | Description                  |
|--------------|--------------------------------------|------------------------------|
| Swp1504UL    | TATCTAGACAAGCGGGTGGGGTAAGTG          | <i>flgH1</i> deletion        |
| Swp1504UR    | CGCTATATAGGATAAACAGGCGCATAATAAGG     | <i>flgH1</i> deletion        |
| Swp1504DL    | TTTATCCTATATAGCGGCACTGGAACATTTG      | <i>flgH1</i> deletion        |
| Swp1504DR    | TAGCATGCGGCGGCATATTGGCACTCACT        | <i>flgH1</i> deletion        |
| Swp5111UL    | ATGAGCTCAGGTCAAGCCGATGCCCAAGAG       | <i>flgH2</i> deletion        |
| Swp5111UR    | CGGATAAGCAAGCATCGCGATTCCAAGTCCTA     | <i>flgH2</i> deletion        |
| Swp5111DL    | GATGCTTGCTTATCCGCGGCGAAAAATGG        | <i>flgH2</i> deletion        |
| Swp5111DR    | TTTCTAGATTAATGCGCTGGGAGGAGATGTCA     | <i>flgH2</i> deletion        |
| Swp1508UL    | AAGAGCTCGCGGCAAACTCGGGCAACA          | <i>flgL1</i> deletion        |
| Swp1508UR    | ATTGATTGACCATCGCAGACTGGCTTTTCATCACAT | <i>flgL1</i> deletion        |
| Swp1508DL    | GCGATGGTCAATCAATCGGCACTGTCTT         | <i>flgL1</i> deletion        |
| Swp1508DR    | AAGGTACCTCTGTATCACCATTGCCGCTGTTC     | <i>flgL1</i> deletion        |
| Swp5115UL    | ATGAGCTCGCGGGAACAACAGCATCAAAAAT      | <i>flgL2</i> deletion        |
| Swp5115UR    | TTGAGTGCATCATCAGAGGGGCGCAGTATCG      | <i>flgL2</i> deletion        |
| Swp5115DL    | CTGATGATGCACTCAAGGTCACCCAGCAACA      | <i>flgL2</i> deletion        |
| Swp5115DR    | ATTCTAGAAGCGGGCAATAAGACTCGGGA        | <i>flgL2</i> deletion        |
| C-Swp5111For | GACTGGTACCTAATTGACTTGAAAAGGATC       | <i>flgH2</i> complementation |
| C-Swp5111Rev | ACGGACGCGTAGTGATTAACCTTCATTGGA       | <i>flgH2</i> complementation |
| C-Swp5115For | TGTAGGTACCATCCTACCAGGCTAACGC         | <i>flgL2</i> complementation |
| C-Swp5115Rev | TCTACTGCAGATCAGTCAGTGGCACCTTA        | <i>flgL2</i> complementation |
| Swp1504RTFor | CCATTGATTCACCGCGAGTA                 | qPCR                         |
| Swp1504RTRev | CAAATGTTCCAGTGCCGCTAT                | qPCR                         |
| Swp1508RTFor | GATGCTGCGCTCAGTAAACG                 | qPCR                         |
| Swp1508RTRev | TCTCATCGGCAATTGTTTGC                 | qPCR                         |
| Swp5111RTFor | TTTGATCCGCACCGATGAT                  | qPCR                         |
| Swp5111RTRev | GCGATGCGCTGAGAAGAGA                  | qPCR                         |
| Swp5115RTFor | AGCCGCGCCGAACTTAT                    | qPCR                         |
| Swp5115RTRev | TCTCGCATACGCGTTTGC                   | qPCR                         |
| Swp2079RTFor | TTAAGGCAATGGAAGCTGCAT                | qPCR                         |
| Swp2079RTRev | CGTCTTTACCCGTTAATGATACGA             | qPCR                         |
| Swp1538RTFor | GTCGCGTTCGATGTGGTT                   | qPCR                         |
| Swp1538RTRev | GCGACTCATAAGCAACATCATCA              | qPCR                         |
| Swp5124RTFor | TTTTGGCCATCGAAGACATG                 | qPCR                         |
| Swp5124RTRev | GCCTTGCGGACTCGAGTAAC                 | qPCR                         |
| Swp1516RTFor | TCCGGTAACTGTGGTGCAA                  | qPCR                         |
| Swp1516RTRev | TGGCCGAATAGCTCACTCTCA                | qPCR                         |
| Swp1517RTFor | CAATAGCGGCACAAAAAGCT                 | qPCR                         |
| Swp1517RTRev | CGAATACACTGTGTCGCATGATT              | qPCR                         |
| Swp1518RTFor | ACGACAGCTTTGACATGGTGAT               | qPCR                         |
| Swp1518RTRev | CCAAGGCCACCAATTCCTT                  | qPCR                         |

---

|                     |                      |      |
|---------------------|----------------------|------|
| <b>Swp5090RTFor</b> | TCGCTGTTGCATCGATTACG | qPCR |
| <b>Swp5090RTRev</b> | AGCGCTGACGAGATCGTTTT | qPCR |

---



**Table S2. The sequenced *Shewanella* strains and their flagellar system**

| No | Species or strain                          | Geographical origin                                | Isolation-site characteristics                             | Genome (Mb) | Flagellar system |
|----|--------------------------------------------|----------------------------------------------------|------------------------------------------------------------|-------------|------------------|
| 1  | <i>Shewanella amazonensis</i> SB2B         | Amapa River, Brazil                                | Sediment; suboxic redox conditions;<br>1 m                 | 4.31        | PF               |
| 2  | <i>Shewanella loihica</i> PV-4             | Hawaiian Sea mount,<br>United States               | Iron-rich mat; hydrothermal vent;<br>1,325 m               | 4.6         | PF               |
| 3  | <i>Shewanella piezotolerans</i> WP3        | West Pacific site WP<br>(142°E, 8°N)               | Sediment; under 1,914 m of water                           | 5.4         | PF+LF            |
| 4  | <i>Shewanella pealeana</i> ATCC 700345     | Woods Hole Harbor,<br>Massachusetts, United States | Squid nidamental gland                                     | 5.17        | PF+LF            |
| 5  | <i>Shewanella halifaxensis</i> HAW-EB4     | Halifax Harbor, Nova Scotia, Canada                | Sediment; munitions dumping area;<br>215 m, Atlantic Ocean | 5.23        | PF+LF            |
| 6  | <i>Shewanella psychrophila</i> WP2         | West Pacific site WP<br>(142°E, 8°N)               | Sediment; under 1,914 m of water                           | 6.35        | PF+LF            |
| 7  | <i>Shewanella violacea</i> DSS12           | Ryuku Trench, Philippine Sea                       | Sediment; 5,110 m                                          | 4.96        | PF               |
| 8  | <i>Shewanella benthica</i> KT99            | Tonga-Kermadec Trench                              | Deep sea; high-pressure zone;<br>9,000 m                   | 4.35        | PF               |
| 9  | <i>Shewanella sediminis</i> HAW-EB3        | Halifax Harbor, Nova Scotia, Canada                | Sediment; 50 nautical miles from shore;<br>215 m           | 5.52        | PF+LF            |
| 10 | <i>Shewanella woodyi</i> ATCC 51908 (MS32) | Strait of Gibraltar, Mediterranean Sea             | Detritus; 370 m                                            | 5.94        | PF               |
| 11 | <i>Shewanella denitrificans</i> OS217      | Baltic Sea                                         | Sea-water; oxic–anoxic interface;<br>120 m                 | 4.55        | PF+LF            |
| 12 | <i>Shewanella frigidimarina</i> NCIMB 400  | Coast of Aberdeen, United Kingdom                  | Sea-water; North Sea                                       | 4.85        | PF               |
| 13 | <i>Shewanella putrefaciens</i> 200         | Alberta, Canada                                    | Crude-oil pipeline                                         | 4.84        | PF               |
| 14 | <i>Shewanella putrefaciens</i> CN-32       | Albuquerque, New Mexico, United States             | Subsurface; shale sandstone; 250 m                         | 4.66        | PF+LF            |
| 15 | <i>Shewanella</i> sp. W3-18-1              | Washington coast, Pacific Ocean                    | Marine sediment; under 997 m of oxic water                 | 4.71        | PF+LF            |
| 16 | <i>Shewanella baltica</i> OS223            | Baltic Sea                                         | Sea-water; anoxic zone; 140 m                              | 5.15        | PF               |
| 17 | <i>Shewanella baltica</i> BA175            | Baltic Sea                                         | ND                                                         | 5.20        | PF               |
| 18 | <i>Shewanella baltica</i> OS117            | Baltic Sea                                         | ND                                                         | 5.53        | PF               |
| 19 | <i>Shewanella baltica</i> OS155            | Baltic Sea                                         | Sea-water; oxic zone; 2 ml per litre of oxygen; 90 m       | 5.34        | PF+LF            |
| 20 | <i>Shewanella baltica</i>                  | Baltic Sea                                         | Sea-water; oxic–anoxic interface;                          | 5.31        | PF               |

|           |                                                         |                                                |                                                         |      |       |
|-----------|---------------------------------------------------------|------------------------------------------------|---------------------------------------------------------|------|-------|
|           | <b>OS185</b>                                            |                                                | 120 m                                                   |      |       |
| <b>21</b> | <b><i>Shewanella baltica</i></b><br><b>OS678</b>        | Baltic Sea                                     | low-oxygen<br>zone just above the chemocline (110<br>m) | 5.37 | PF    |
| <b>22</b> | <b><i>Shewanella baltica</i></b><br><b>OS195</b>        | Baltic Sea                                     | Sea-water; anoxic zone; 140 m                           | 5.55 | PF    |
| <b>23</b> | <b><i>Shewanella oneidensis</i></b><br><b>MR-1</b>      | Lake Oneida, New York,<br>United States        | Sediment; anaerobic; Mn(IV)<br>reduction                | 5.13 | PF    |
| <b>24</b> | <b><i>Shewanella</i> sp. ANA-3</b>                      | Woods Hole,<br>Massachusetts,<br>United States | Brackish water; arsenic-treated<br>wooden pier          | 5.25 | PF    |
| <b>25</b> | <b><i>Shewanella</i> sp. MR-7</b>                       | Black Sea                                      | Sea-water; anoxic zone; high NO <sub>3</sub> ;<br>60 m  | 4.79 | PF    |
| <b>26</b> | <b><i>Shewanella</i> sp. MR-4</b>                       | Black Sea                                      | Sea-water; oxic zone; 16°C; 5 m                         | 4.71 | PF    |
| <b>27</b> | <b><i>Shewanella fidelis</i></b><br><b>ATCC BAA-318</b> | The South China Sea                            | Sediment; depth of 73 m                                 | 4.8  | PF+LF |

**Table S3. The protein sequence of FlgH used in the pylogenetic analysis**

| No | Class                      | Species                                             | gi Number |
|----|----------------------------|-----------------------------------------------------|-----------|
| 1  | <i>Thermotogae</i>         | <i>Thermotoga maritima</i> MSB8                     | 15644288  |
| 2  | <i>Gammaproteobacteria</i> | <i>Shewanella denitrificans</i> OS217               | 91713419  |
| 3  | <i>Alphaproteobacteria</i> | <i>Sinorhizobium fredii</i> HH103                   | 365177968 |
| 4  | <i>Alphaproteobacteria</i> | <i>Agrobacterium tumefaciens</i>                    | 1086565   |
| 5  | <i>Alphaproteobacteria</i> | <i>Agrobacterium albertimagni</i>                   | 493777918 |
| 6  | <i>Alphaproteobacteria</i> | <i>Sinorhizobium meliloti</i>                       | 489625448 |
| 7  | <i>Alphaproteobacteria</i> | <i>Ensifer sojae</i>                                | 736851944 |
| 8  | <i>Betaproteobacteria</i>  | <i>Chromobacterium violaceum</i>                    | 768336605 |
| 9  | <i>Betaproteobacteria</i>  | <i>Ralstonia solanacearum</i> UW551                 | 83725703  |
| 10 | <i>Betaproteobacteria</i>  | <i>Bordetella petrii</i>                            | 754361705 |
| 11 | <i>Gammaproteobacteria</i> | <i>Escherichia coli</i> str. K-12 substr. MG1655    | 16129042  |
| 12 | <i>Gammaproteobacteria</i> | <i>Shigella flexneri</i>                            | 745761840 |
| 13 | <i>Gammaproteobacteria</i> | <i>Vibrio parahaemolyticus</i> RIMD 2210633         | 28805768  |
| 14 | <i>Gammaproteobacteria</i> | <i>Photobacterium profundum</i>                     | 499536872 |
| 15 | <i>Gammaproteobacteria</i> | <i>Rheinheimera nanhaiensis</i> E407-8              | 383704066 |
| 16 | <i>Gammaproteobacteria</i> | <i>Pseudoalteromonas</i> sp. SM9913                 | 315015864 |
| 17 | <i>Gammaproteobacteria</i> | <i>Pseudoalteromonas citrea</i> DSM 8771            | 540253670 |
| 18 | <i>Gammaproteobacteria</i> | <i>Pseudoalteromonas luteoviolacea</i> B ATCC 29581 | 441749577 |
| 19 | <i>Gammaproteobacteria</i> | <i>Pseudoalteromonas flavipulchra</i>               | 498292150 |
| 20 | <i>Gammaproteobacteria</i> | <i>Ferrimonas kyonanensis</i>                       | 654652128 |
| 21 | <i>Gammaproteobacteria</i> | <i>Ferrimonas futtsuensis</i>                       | 654649162 |
| 22 | <i>Gammaproteobacteria</i> | <i>Ferrimonas senticii</i>                          | 737406071 |
| 23 | <i>Gammaproteobacteria</i> | <i>Ferrimonas balearica</i> DSM 9799                | 307632559 |
| 24 | <i>Gammaproteobacteria</i> | <i>Shewanella amazonensis</i> SB2B                  | 119767947 |
| 25 | <i>Gammaproteobacteria</i> | <i>Shewanella denitrificans</i> OS217               | 91714669  |
| 26 | <i>Gammaproteobacteria</i> | <i>Shewanella putrefaciens</i> CN-32                | 145565377 |
| 27 | <i>Gammaproteobacteria</i> | <i>Shewanella decolorationis</i> S12                | 553947544 |
| 28 | <i>Gammaproteobacteria</i> | <i>Shewanella</i> sp. MR-7                          | 113888283 |
| 29 | <i>Gammaproteobacteria</i> | <i>Shewanella baltica</i> OS155                     | 125998348 |
| 30 | <i>Gammaproteobacteria</i> | <i>Shewanella putrefaciens</i>                      | 655354729 |
| 31 | <i>Gammaproteobacteria</i> | <i>Shewanella loihica</i> PV-4                      | 126637577 |
| 32 | <i>Gammaproteobacteria</i> | <i>Shewanella violacea</i> DSS12                    | 293326657 |
| 33 | <i>Gammaproteobacteria</i> | <i>Shewanella sediminis</i> HAW-EB3                 | 157318587 |
| 34 | <i>Gammaproteobacteria</i> | <i>Shewanella piezotolerans</i> WP3                 | 212555835 |
| 35 | <i>Gammaproteobacteria</i> | <i>Shewanella pealeana</i> ATCC 700345              | 157846174 |
| 36 | <i>Gammaproteobacteria</i> | <i>Shewanella fidelis</i>                           | 655362488 |
| 37 | <i>Gammaproteobacteria</i> | <i>Shewanella halifaxensis</i> HAW-EB4              | 167353386 |
| 38 | <i>Gammaproteobacteria</i> | <i>Pseudoalteromonas</i> sp. SM9913                 | 315014501 |
| 39 | <i>Gammaproteobacteria</i> | <i>Ferrimonas balearica</i> DSM 9799                | 307632211 |
| 40 | <i>Gammaproteobacteria</i> | <i>Ferrimonas futtsuensis</i>                       | 654647905 |
| 41 | <i>Gammaproteobacteria</i> | <i>Ferrimonas kyonanensis</i>                       | 654653971 |
| 42 | <i>Gammaproteobacteria</i> | <i>Shewanella sediminis</i> HAW-EB3                 | 157315578 |

---

|    |                                   |                                             |           |
|----|-----------------------------------|---------------------------------------------|-----------|
| 43 | <b><i>Gammaproteobacteria</i></b> | <i>Shewanella denitrificans</i> OS217       | 91716994  |
| 44 | <b><i>Gammaproteobacteria</i></b> | <i>Shewanella baltica</i> OS155             | 125999358 |
| 45 | <b><i>Gammaproteobacteria</i></b> | <i>Shewanella</i> sp. W3-18-1               | 120557401 |
| 46 | <b><i>Gammaproteobacteria</i></b> | <i>Shewanella putrefaciens</i> CN-32        | 145566237 |
| 47 | <b><i>Gammaproteobacteria</i></b> | <i>Shewanella pealeana</i> ATCC 700345      | 157844899 |
| 48 | <b><i>Gammaproteobacteria</i></b> | <i>Shewanella piezotolerans</i> WP3         | 212559272 |
| 49 | <b><i>Gammaproteobacteria</i></b> | <i>Shewanella fidelis</i>                   | 655361441 |
| 50 | <b><i>Gammaproteobacteria</i></b> | <i>Shewanella halifaxensis</i> HAW-EB4      | 167356180 |
| 51 | <b><i>Gammaproteobacteria</i></b> | <i>Chromobacterium violaceum</i>            | 768336826 |
| 52 | <b><i>Gammaproteobacteria</i></b> | <i>Chromobacterium haemolyticum</i>         | 759908292 |
| 53 | <b><i>Gammaproteobacteria</i></b> | <i>Pseudogulbenkiania</i> sp. NH8B          | 503853881 |
| 54 | <b><i>Gammaproteobacteria</i></b> | <i>Pseudogulbenkiania ferrooxidans</i>      | 496241021 |
| 55 | <b><i>Gammaproteobacteria</i></b> | <i>Grimontia hollisae</i>                   | 750224026 |
| 56 | <b><i>Gammaproteobacteria</i></b> | <i>Photobacterium marinum</i>               | 494727063 |
| 57 | <b><i>Gammaproteobacteria</i></b> | <i>Photobacterium profundum</i>             | 752746676 |
| 58 | <b><i>Gammaproteobacteria</i></b> | <i>Photobacterium halotolerans</i>          | 653000184 |
| 59 | <b><i>Gammaproteobacteria</i></b> | <i>Photobacterium galathea</i>              | 636574688 |
| 60 | <b><i>Gammaproteobacteria</i></b> | <i>Photobacterium angustum</i>              | 767119450 |
| 61 | <b><i>Gammaproteobacteria</i></b> | <i>Photobacterium leiognath</i>             | 767076517 |
| 62 | <b><i>Gammaproteobacteria</i></b> | <i>Enterovibrio norvegicus</i>              | 515572155 |
| 63 | <b><i>Gammaproteobacteria</i></b> | <i>Vibrio rotiferianus</i>                  | 657850858 |
| 64 | <b><i>Gammaproteobacteria</i></b> | <i>Vibrio parahaemolyticus</i> RIMD 2210633 | 28900125  |

---
